# Supplementary material for: Targeted nanoparticles modify neutrophil function in vivo
Source: PubMed Central journal article supplement (PMC9580275; doi:10.3389/fimmu.2022.1003871), 2022-10-05
Supplement: Table_1.pdf [file Table_1.pdf]

| <b>Donor</b> | <b>Age</b> | <b>F/M</b> | <b>Health status</b> |
|--------------|------------|------------|----------------------|
| <b>1</b>     | 33         | F          | Healthy              |
| <b>2</b>     | 30         | F          | Healthy              |
| <b>3</b>     | 60         | F          | Healthy              |
| <b>4</b>     | 22         | M          | Healthy              |
| <b>5</b>     | 45         | M          | Healthy              |
| <b>6</b>     | 42         | F          | Healthy              |
| <b>7</b>     | 48         | M          | Healthy              |
| <b>8</b>     | 38         | M          | Healthy              |
| <b>9</b>     | 25         | F          | Healthy              |
| <b>10</b>    | 30         | F          | Healthy              |
| <b>11</b>    | 57         | F          | Lung cancer          |
| <b>12</b>    | 75         | M          | Stable COPD          |
| <b>13</b>    | 81         | M          | Stable COPD          |
